# Supplementary material for: The Mediating Role of SES on the Relationship between Pregnancy History and Later Life Cognition
Source: bioRxiv or medRxiv preprint supplement (doi:10.1101/2021.09.29.21264303), 2021-09-30
Supplement: Supplementary file [file media-1.pdf]

**Table 1: Demographics of Study Sample**

| Number of Term Pregnancies               | Overall, N =<br>1,016 | 0, N = 116  | 1-2, N = 420 | 3-4, N = 339 | 5 or more, N = 141 | p-<br>value <sup>a</sup> |
|------------------------------------------|-----------------------|-------------|--------------|--------------|--------------------|--------------------------|
| Age, Mean (SD)                           | 67.3 (5.4)            | 67.1 (5.4)  | 66.4 (5.0)   | 67.7 (5.5)   | 69.3 (5.6)         | <b>&lt;0.001</b>         |
| Race, n (%)                              |                       |             |              |              |                    | <b>&lt;0.001</b>         |
| Hispanic                                 | 206 (20%)             | 16 (14%)    | 67 (16%)     | 77 (23%)     | 46 (33%)           |                          |
| White                                    | 466 (46%)             | 57 (49%)    | 212 (50%)    | 151 (45%)    | 46 (33%)           |                          |
| Black                                    | 240 (24%)             | 23 (20%)    | 90 (21%)     | 86 (25%)     | 41 (29%)           |                          |
| Asian                                    | 90 (8.9%)             | 16 (14%)    | 47 (11%)     | 22 (6.5%)    | 5 (3.5%)           |                          |
| Multi-Cultural                           | 14 (1.4%)             | 4 (3.4%)    | 4 (1.0%)     | 3 (0.9%)     | 3 (2.1%)           |                          |
| Education Level, n (%)                   |                       |             |              |              |                    | <b>&lt;0.001</b>         |
| High school graduate/GED                 | 249 (25%)             | 22 (19%)    | 101 (24%)    | 92 (27%)     | 34 (24%)           |                          |
| Less than 9th grade                      | 90 (8.9%)             | 7 (6.0%)    | 18 (4.3%)    | 28 (8.3%)    | 37 (26%)           |                          |
| 9-11th grade                             | 138 (14%)             | 6 (5.2%)    | 37 (8.8%)    | 62 (18%)     | 33 (23%)           |                          |
| Some College                             | 323 (32%)             | 34 (29%)    | 154 (37%)    | 107 (32%)    | 28 (20%)           |                          |
| College graduate or above                | 216 (21%)             | 47 (41%)    | 110 (26%)    | 50 (15%)     | 9 (6.4%)           |                          |
| PIR, Mean (SD)                           | 2.58 (1.62)           | 2.78 (1.69) | 2.95 (1.69)  | 2.42 (1.50)  | 1.68 (1.21)        | <b>&lt;0.001</b>         |
| Reproductive Span, Mean (SD)             | 33 (8)                | 34 (8)      | 34 (8)       | 33 (8)       | 33 (7)             | 0.2                      |
| BMI, Mean (SD)                           | 30 (7)                | 29 (8)      | 30 (8)       | 30 (7)       | 31 (7)             | <b>0.048</b>             |
| Smoked at least 100 cigarettes in life?, | 400 (39%)             | 50 (43%)    | 169 (40%)    | 125 (37%)    | 56 (40%)           | 0.6                      |
| PHQ (Depression Screener), Mean (SD)     | 3.9 (4.9)             | 3.4 (4.6)   | 3.7 (4.7)    | 4.0 (4.9)    | 4.9 (5.6)          | 0.2                      |
| Medical Conditions, Mean (SD)            | 1.34 (1.06)           | 1.29 (1.01) | 1.27 (1.03)  | 1.33 (1.07)  | 1.61 (1.14)        | <b>0.017</b>             |
| Incomplete Pregnancies, n (%)            |                       |             |              |              |                    | 0.081                    |
| 0                                        | 645 (63%)             | 83 (72%)    | 264 (63%)    | 215 (63%)    | 83 (59%)           |                          |
| 1-2                                      | 322 (32%)             | 27 (23%)    | 135 (32%)    | 114 (34%)    | 46 (33%)           |                          |
| 3 or more                                | 49 (4.8%)             | 6 (5.2%)    | 21 (5.0%)    | 10 (2.9%)    | 12 (8.5%)          |                          |

<sup>a</sup>Kruskal-Wallis rank sum test; Pearson's Chi-squared test

Note: PIR = Poverty Index Ratio; Reproductive Span = Age Menopause--Age of Menarche; PHQ = Patient Health Questionnaire (Depression Screener); Medical Conditions = Diabetes + Heart Disease + Thyroid Disease + History of Stroke + Sleep Disorders + Hypertension. Values: 0=No, 1=Yes, 0.5=Borderline (diabetes only), the higher an individual's score the higher number of the aforementioned conditions participant self-reported.

**Table 2: Linear Regression Continuous Pregnancy Variables**

| Cognitive Test | Type of Pregnancy | Model 1           |                 |                     | Model 2           |                 |                     | Model 3           |                 |                     | Model 4           |                 |                     |
|----------------|-------------------|-------------------|-----------------|---------------------|-------------------|-----------------|---------------------|-------------------|-----------------|---------------------|-------------------|-----------------|---------------------|
|                |                   | Beta <sup>a</sup> | SE <sup>b</sup> | 95% CI <sup>b</sup> | Beta <sup>a</sup> | SE <sup>b</sup> | 95% CI <sup>b</sup> | Beta <sup>a</sup> | SE <sup>b</sup> | 95% CI <sup>b</sup> | Beta <sup>a</sup> | SE <sup>b</sup> | 95% CI <sup>b</sup> |
| DSST           | Term              | -0.09***          | 0.014           | -0.12, -0.06        | -0.03*            | 0.014           | -0.06, -0.01        | -0.07***          | 0.014           | -0.09, -0.04        | -0.03             | 0.013           | -0.05, 0.00         |
|                | Incomplete        | 0.01              | 0.028           | -0.05, 0.06         | 0                 | 0.025           | -0.05, 0.05         | 0.01              | 0.027           | -0.04, 0.06         | 0.01              | 0.025           | -0.04, 0.05         |
|                | R <sup>2</sup>    | 0.329             |                 |                     | 0.455             |                 |                     | 0.386             |                 |                     | 0.474             |                 |                     |
| AF             | Term              | -0.03*            | 0.016           | -0.07, 0.00         | 0                 | 0.016           | -0.03, 0.03         | -0.02             | 0.016           | -0.05, 0.01         | 0                 | 0.016           | -0.03, 0.03         |
|                | Incomplete        | 0.06*             | 0.031           | 0.00, 0.12          | 0.06              | 0.03            | 0.00, 0.11          | 0.06*             | 0.03            | 0.00, 0.12          | 0.06              | 0.03            | 0.00, 0.12          |
|                | R <sup>2</sup>    | 0.189             |                 |                     | 0.24              |                 |                     | 0.203             |                 |                     | 0.241             |                 |                     |
| CERAD-WL       | Term              | -0.02             | 0.016           | -0.05, 0.01         | 0.01              | 0.017           | -0.02, 0.04         | -0.01             | 0.016           | -0.04, 0.02         | 0.01              | 0.017           | -0.02, 0.05         |
|                | Incomplete        | 0.05              | 0.031           | -0.01, 0.11         | 0.05              | 0.031           | -0.01, 0.11         | 0.05              | 0.031           | -0.01, 0.11         | 0.05              | 0.03            | -0.01, 0.11         |
|                | R <sup>2</sup>    | 0.126             |                 |                     | 0.176             |                 |                     | 0.141             |                 |                     | 0.179             |                 |                     |
| CERAD-DR       | Term              | -0.04**           | 0.017           | -0.08, -0.01        | -0.02             | 0.017           | -0.05, 0.02         | -0.03*            | 0.017           | -0.07, 0.00         | -0.01             | 0.017           | -0.05, 0.02         |
|                | Incomplete        | 0.07*             | 0.032           | 0.01, 0.13          | 0.07*             | 0.031           | 0.00, 0.13          | 0.07*             | 0.032           | 0.01, 0.13          | 0.07*             | 0.031           | 0.01, 0.13          |
|                | R <sup>2</sup>    | 0.119             |                 |                     | 0.149             |                 |                     | 0.132             |                 |                     | 0.153             |                 |                     |

<sup>a</sup>\*p<0.05; \*\*p<0.01; \*\*\*p<0.001

<sup>b</sup>SE = Standard Error, CI = Confidence Interval

**Model 1/Base Model:** Age at Screening, Race, Length of Reproductive Span, BMI, Smoking Status, Medical Conditions Score, and PHQ (depression screener); **Model 2:**

Model 1 + Education Level; **Model 3:** Model 1 + Federal Income-to-Poverty Ratio (PIR); **Model 4:** Model 1 + Education Level and PIR

**DSST:** Digit Symbol Substitution Test, **AF:** Animal Fluency, **CERAD-WL:** CERAD Word Learning, **CERAD-DR:** CERAD Delayed Recall

**Table 3:** Mediation Analysis of PIR for Number of Pregnancies by Cognitive Test

|                          | Estimate | 95% CI Lower | 95% CI Upper | Proportion Mediated (95%CI) |
|--------------------------|----------|--------------|--------------|-----------------------------|
| <b>DSST</b>              |          |              |              | 0.28 (0.17-0.42)            |
| Average Indirect Effects | -0.02    | -0.03        | -0.02        |                             |
| Average Direct Effects   | -0.07    | -0.09        | -0.04        |                             |
| Total Effect             | -0.09    | -0.12        | -0.06        |                             |
| <b>AF</b>                |          |              |              | 0.34 (0.03-1.84)            |
| Average Indirect Effects | -0.01    | -0.02        | -0.01        |                             |
| Average Direct Effects   | -0.02    | -0.06        | 0.01         |                             |
| Total Effect             | -0.03    | -0.07        | 0.00         |                             |
| <b>CERAD-WL</b>          |          |              |              | 0.56 (-4.60-5.96)           |
| Average Indirect Effects | -0.01    | -0.02        | -0.01        |                             |
| Average Direct Effects   | -0.01    | -0.05        | 0.03         |                             |
| Total Effect             | -0.02    | -0.06        | 0.02         |                             |
| <b>CERAD-DR</b>          |          |              |              | 0.26 (0.10-1.48)            |
| Average Indirect Effects | -0.01    | -0.02        | -0.01        |                             |
| Average Direct Effects   | -0.03    | -0.07        | 0.01         |                             |
| Total Effect             | -0.04    | -0.08        | -0.01        |                             |

Note: **DSST:** Digit Symbol Substitution Test, **AF:** Animal Fluency, **CERAD-WL:** CERAD Word Learning, **CERAD-DR:** CERAD Delayed Recall

**Table 4:** Mediation Analysis of Education Level for Number of Pregnancies by Cognitive Test

|                          | Estimate | 95% CI Lower | 95% CI Upper | Proportion Mediated (95%CI) |
|--------------------------|----------|--------------|--------------|-----------------------------|
| <b>DSST</b>              |          |              |              | 0.42 (-0.50-0.94)           |
| Average Indirect Effects | -0.02    | -0.06        | 0.02         |                             |
| Average Direct Effects   | -0.03    | -0.06        | 0.00         |                             |
| Total Effect             | -0.06    | -0.10        | -0.01        |                             |
| <b>AF</b>                |          |              |              | 1.14 (-7.64-8.13)           |
| Average Indirect Effects | -0.01    | -0.04        | 0.00         |                             |
| Average Direct Effects   | 0.00     | -0.03        | 0.04         |                             |
| Total Effect             | -0.01    | -0.06        | 0.02         |                             |
| <b>CERAD-WL</b>          |          |              |              | 3.10 (-7.89-12.36)          |
| Average Indirect Effects | -0.02    | -0.04        | 0.01         |                             |
| Average Direct Effects   | 0.01     | -0.03        | 0.05         |                             |
| Total Effect             | -0.01    | -0.05        | 0.04         |                             |
| Prop. Mediated           | 2.05     | -7.88        | 15.39        |                             |
| <b>CERAD-DR</b>          |          |              |              | 0.14 (-1.94-2.85)           |
| Average Indirect Effects | 0.00     | -0.03        | 0.00         |                             |
| Average Direct Effects   | -0.02    | -0.06        | 0.02         |                             |
| Total Effect             | -0.02    | -0.07        | 0.01         |                             |

Note: **DSST:** Digit Symbol Substitution Test, **AF:** Animal Fluency, **CERAD-WL:** CERAD Word Learning, **CERAD-DR:** CERAD Delayed Recall

**Supplemental Table 1: Linear Regression Categorical Pregnancy Variables**

| Cognitive Exercise | Type of Pregnancy | Model 1           |                 |                     | Model 2           |                 |                     | Model 3           |                 |                     | Model 4           |                 |                     |
|--------------------|-------------------|-------------------|-----------------|---------------------|-------------------|-----------------|---------------------|-------------------|-----------------|---------------------|-------------------|-----------------|---------------------|
|                    |                   | Beta <sup>a</sup> | SE <sup>b</sup> | 95% CI <sup>b</sup> | Beta <sup>a</sup> | SE <sup>b</sup> | 95% CI <sup>b</sup> | Beta <sup>a</sup> | SE <sup>b</sup> | 95% CI <sup>b</sup> | Beta <sup>a</sup> | SE <sup>b</sup> | 95% CI <sup>b</sup> |
| <b>DSST</b>        | <b>Term</b>       |                   |                 |                     |                   |                 |                     |                   |                 |                     |                   |                 |                     |
|                    | 0                 | —                 | —               | —                   | —                 | —               | —                   | —                 | —               | —                   | —                 | —               | —                   |
|                    | 1-2               | -0.05             | 0.087           | 0.22, 0.12          | -0.02             | 0.078           | 0.17, 0.14          | -0.08             | 0.083           | 0.24, 0.08          | -0.05             | 0.077           | -0.20, 0.10         |
|                    | 3-4               | -0.16             | 0.09            | 0.33, 0.02          | -0.02             | 0.082           | 0.18, 0.14          | -0.12             | 0.086           | 0.28, 0.05          | -0.03             | 0.081           | -0.19, 0.13         |
|                    | 5 or more         | 0.46***           | 0.106           | 0.67, 0.26          | -0.12             | 0.098           | 0.31, 0.07          | 0.34**            | 0.102           | 0.54, 0.14          | -0.1              | 0.097           | -0.29, 0.09         |
|                    | <b>Incomplete</b> |                   |                 |                     |                   |                 |                     |                   |                 |                     |                   |                 |                     |
|                    | 0                 | —                 | —               | —                   | —                 | —               | —                   | —                 | —               | —                   | —                 | —               | —                   |
|                    | 1-2               | 0.05              | 0.057           | 0.07, 0.16          | 0.02              | 0.052           | 0.08, 0.12          | 0.05              | 0.054           | 0.06, 0.15          | 0.02              | 0.051           | -0.08, 0.12         |
|                    | 3 or more         | -0.09             | 0.126           | 0.34, 0.15          | -0.06             | 0.113           | 0.28, 0.16          | -0.05             | 0.12            | 0.29, 0.18          | -0.04             | 0.112           | -0.26, 0.18         |
|                    |                   | R <sup>2</sup>    | 0.323           |                     |                   | 0.454           |                     |                   | 0.382           |                     |                   | 0.472           |                     |
| <b>AF</b>          | <b>Term</b>       |                   |                 |                     |                   |                 |                     |                   |                 |                     |                   |                 |                     |
|                    | 0                 | —                 | —               | —                   | —                 | —               | —                   | —                 | —               | —                   | —                 | —               | —                   |
|                    | 1-2               | 0.16              | 0.095           | 0.02, 0.35          | 0.21*             | 0.092           | 0.03, 0.39          | -0.02             | 0.096           | 0.21, 0.17          | 0.21*             | 0.093           | 0.03, 0.39          |

|                 |                      |       |       |                    |       |       |                    |       |       |                    |       |       |             |
|-----------------|----------------------|-------|-------|--------------------|-------|-------|--------------------|-------|-------|--------------------|-------|-------|-------------|
|                 | 3-4                  | 0.07  | 0.098 | -<br>0.12,<br>0.26 | 0.19* | 0.097 | 0.00,<br>0.38      | 0.03  | 0.1   | -<br>0.17,<br>0.22 | 0.19* | 0.097 | 0.00, 0.38  |
|                 | 5 or more            | -0.11 | 0.116 | -<br>0.33,<br>0.12 | 0.12  | 0.116 | -<br>0.11,<br>0.34 | 0.01  | 0.119 | -<br>0.22,<br>0.24 | 0.12  | 0.116 | -0.11, 0.35 |
|                 | <b>Incomplete</b>    |       |       |                    |       |       |                    |       |       |                    |       |       |             |
|                 | 0                    | —     | —     | —                  | —     | —     | —                  | —     | —     | —                  | —     | —     | —           |
|                 | 1-2                  | 0.12  | 0.062 | 0.00,<br>0.24      | 0.09  | 0.061 | -<br>0.03,<br>0.21 | 0.04  | 0.063 | -<br>0.08,<br>0.17 | 0.09  | 0.061 | -0.02, 0.21 |
|                 | 3 or more            | 0.14  | 0.137 | -<br>0.13,<br>0.41 | 0.15  | 0.133 | -<br>0.11,<br>0.41 | 0.2   | 0.14  | -<br>0.08,<br>0.47 | 0.15  | 0.133 | -0.11, 0.42 |
|                 | <b>R<sup>2</sup></b> | 0.194 |       |                    | 0.244 |       |                    | 0.14  |       |                    | 0.245 |       |             |
| <b>CERAD-WL</b> | <b>Term</b>          |       |       |                    |       |       |                    |       |       |                    |       |       |             |
|                 | 0                    | —     | —     | —                  | —     | —     | —                  | —     | —     | —                  | —     | —     | —           |
|                 | 1-2                  | 0     | 0.097 | -<br>0.19,<br>0.19 | 0.03  | 0.095 | -<br>0.16,<br>0.21 | -0.02 | 0.096 | -<br>0.21,<br>0.17 | 0.01  | 0.095 | -0.17, 0.20 |
|                 | 3-4                  | 0.01  | 0.1   | -<br>0.19,<br>0.20 | 0.09  | 0.099 | -<br>0.11,<br>0.28 | 0.03  | 0.1   | -<br>0.17,<br>0.22 | 0.08  | 0.099 | -0.11, 0.28 |
|                 | 5 or more            | -0.05 | 0.119 | -<br>0.29,<br>0.18 | 0.15  | 0.119 | -<br>0.08,<br>0.39 | 0.01  | 0.119 | -<br>0.22,<br>0.24 | 0.16  | 0.119 | -0.07, 0.40 |
|                 | <b>Incomplete</b>    |       |       |                    |       |       |                    |       |       |                    |       |       |             |
|                 | 0                    | —     | —     | —                  | —     | —     | —                  | —     | —     | —                  | —     | —     | —           |
|                 | 1-2                  | 0.04  | 0.064 | -<br>0.08,<br>0.17 | 0.03  | 0.062 | -<br>0.09,<br>0.16 | 0.04  | 0.063 | -<br>0.08,<br>0.17 | 0.04  | 0.062 | -0.09, 0.16 |

|                 |                   |       |       |                    |       |       |                    |       |       |                    |       |       |             |
|-----------------|-------------------|-------|-------|--------------------|-------|-------|--------------------|-------|-------|--------------------|-------|-------|-------------|
|                 | 3 or more         | 0.18  | 0.141 | -<br>0.10,<br>0.45 | 0.2   | 0.137 | -<br>0.07,<br>0.47 | 0.2   | 0.14  | -<br>0.08,<br>0.47 | 0.21  | 0.137 | -0.06, 0.48 |
|                 | R <sup>2</sup>    | 0.124 |       |                    | 0.177 |       |                    | 0.14  |       |                    | 0.181 |       |             |
| <b>CERAD-DR</b> | <b>Term</b>       |       |       |                    |       |       |                    |       |       |                    |       |       |             |
|                 | 0                 | —     | —     | —                  | —     | —     | —                  | —     | —     | —                  | —     | —     | —           |
|                 | 1-2               | -0.02 | 0.099 | -<br>0.22,<br>0.17 | 0     | 0.098 | -<br>0.19,<br>0.20 | -0.04 | 0.098 | -<br>0.23,<br>0.16 | -0.01 | 0.098 | -0.20, 0.18 |
|                 | 3-4               | -0.1  | 0.102 | -<br>0.30,<br>0.10 | -0.03 | 0.102 | -<br>0.23,<br>0.17 | -0.08 | 0.102 | -<br>0.28,<br>0.12 | -0.03 | 0.102 | -0.23, 0.17 |
|                 | 5 or more         | -0.21 | 0.121 | -<br>0.45,<br>0.03 | -0.04 | 0.123 | -<br>0.28,<br>0.20 | -0.15 | 0.121 | -<br>0.38,<br>0.09 | -0.03 | 0.123 | -0.27, 0.21 |
|                 | <b>Incomplete</b> |       |       |                    |       |       |                    |       |       |                    |       |       |             |
|                 | 0                 | —     | —     | —                  | —     | —     | —                  | —     | —     | —                  | —     | —     | —           |
|                 | 1-2               | 0.1   | 0.065 | -<br>0.03,<br>0.23 | 0.09  | 0.064 | -<br>0.04,<br>0.21 | 0.1   | 0.065 | -<br>0.03,<br>0.23 | 0.09  | 0.064 | -0.04, 0.21 |
|                 | 3 or more         | 0.18  | 0.144 | -<br>0.10,<br>0.47 | 0.2   | 0.141 | -<br>0.08,<br>0.48 | 0.21  | 0.143 | -<br>0.07,<br>0.49 | 0.21  | 0.141 | -0.07, 0.49 |
|                 | R <sup>2</sup>    | 0.115 |       |                    | 0.148 |       |                    | 0.129 |       |                    | 0.152 |       |             |

<sup>a</sup>\*p<0.05; \*\*p<0.01; \*\*\*p<0.001

<sup>b</sup>SE = Standard Error, CI = Confidence Interval

Note: 0 Term or incomplete pregnancies are the reference groups; **DSST**: Digit Symbol Substitution Test, **AF**: Animal Fluency, **CERAD-WL**: CERAD Word Learning, **CERAD-DR**: CERAD Delayed Recall
